# Supplementary material for: Molecular dynamics insight into viscosity reduction of hydrolysed polyacrylamide by using carbon quantum dots
Source: Royal Society of Chemistry journal article supplement (doi:10.1039/d1ra03935k), 2021-01-01
Supplement: d1ra03935k1.pdf [file d1ra03935k1.pdf]

Supporting information for:

**Molecular dynamics insight into viscosity reduction of hydrolysed  
polyacrylamide by using carbon quantum dots**

*Guice Yao<sup>1</sup>, Jin Zhao<sup>2\*</sup>, Maje Alhaji Haruna<sup>3</sup> Dongsheng Wen<sup>1,2,3\*</sup>*

<sup>1</sup>*School of Aeronautic Science and Engineering, Beihang University, Beijing, 100191*

<sup>2</sup>*School of General Engineering, Beihang University, Beijing, 100191*

<sup>3</sup>*School of Chemical and Process Engineering, University of Leeds, Leeds, LS2 9JT*

Table S1 force field parameters for the HPAM and the CQD

| <b>group/atom</b>     | <b>atom type</b>            | <b>atom charge</b> |
|-----------------------|-----------------------------|--------------------|
| edge C                | Cheng and Steele            | -0.21              |
| edge H                | OPLS 146                    | 0.179              |
| pure CD               | Cheng and Steele            | -0.18              |
| hydroxyl-O            | OPLS 167                    | -0.605             |
| hydroxyl-H            | OPLS 168                    | 0.4                |
| C(COO <sup>-</sup> )  | OPLS 271                    | 0.7                |
| O(COO <sup>-</sup> )  | OPLS 272                    | -0.8               |
| Na <sup>+</sup>       | OPLS_407                    | 1                  |
| Cl <sup>-</sup>       | OPLS_401                    | -1                 |
| C(CONH <sub>2</sub> ) | OPLS 235                    | 0.5                |
| O(CONH <sub>2</sub> ) | OPLS 236                    | -0.5               |
| N(CONH <sub>2</sub> ) | OPLS 237                    | -0.76              |
| H(CONH <sub>2</sub> ) | OPLS 240                    | 0.38               |
| alkane C              | OPLS 135/OPLS 136/ OPLS 137 | -0.12              |
| alkane H              | OPLS 140                    | 0.06               |

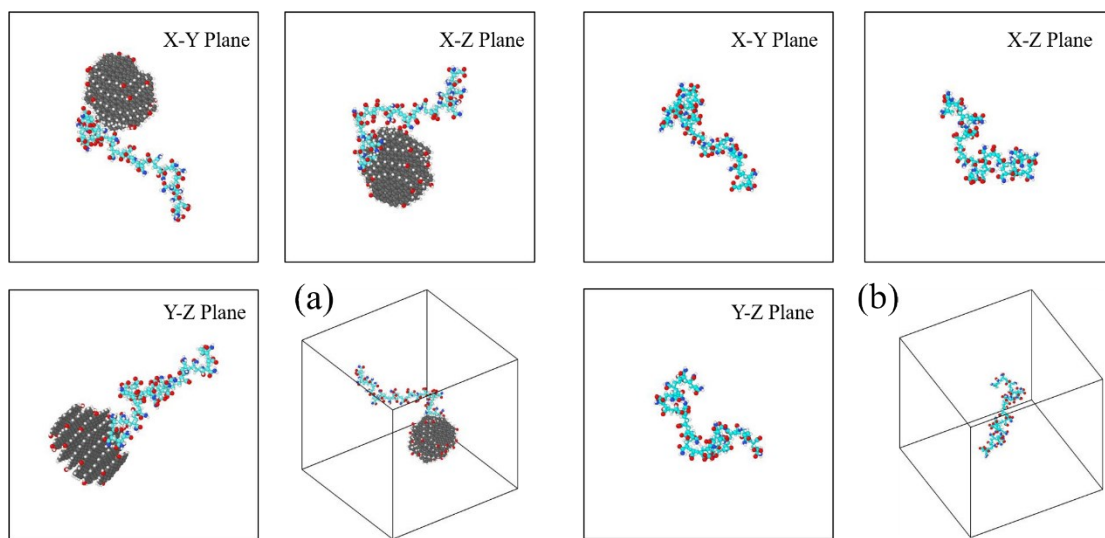

Figure S1 the three-views snapshots of HPAM40\_dot and HPAM40\_solo around  $t = 40$  ns

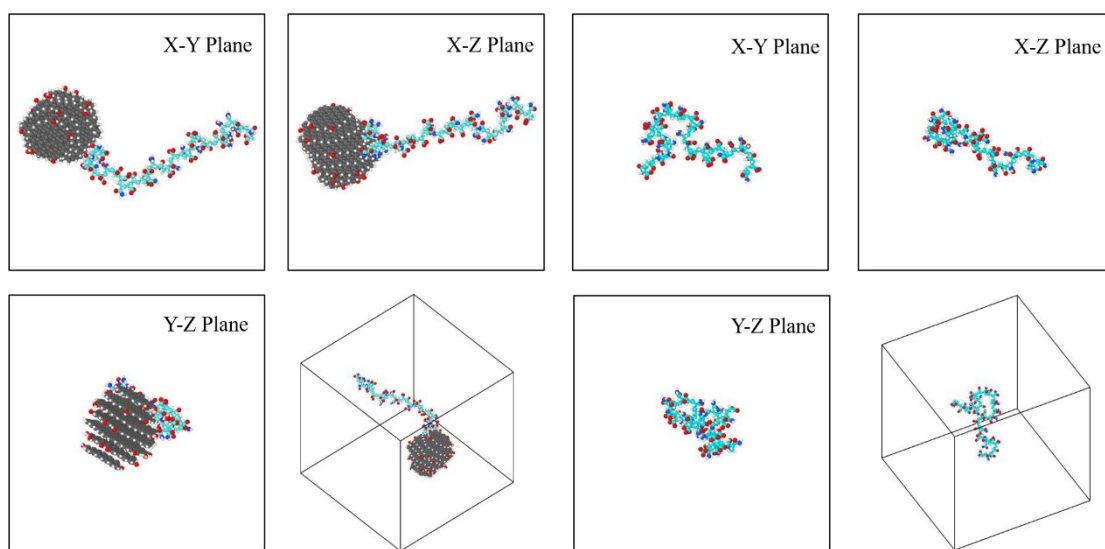

Figure S2 the three-views snapshots of HPAM40\_dot and HPAM40\_solo around  $t = 80$  ns

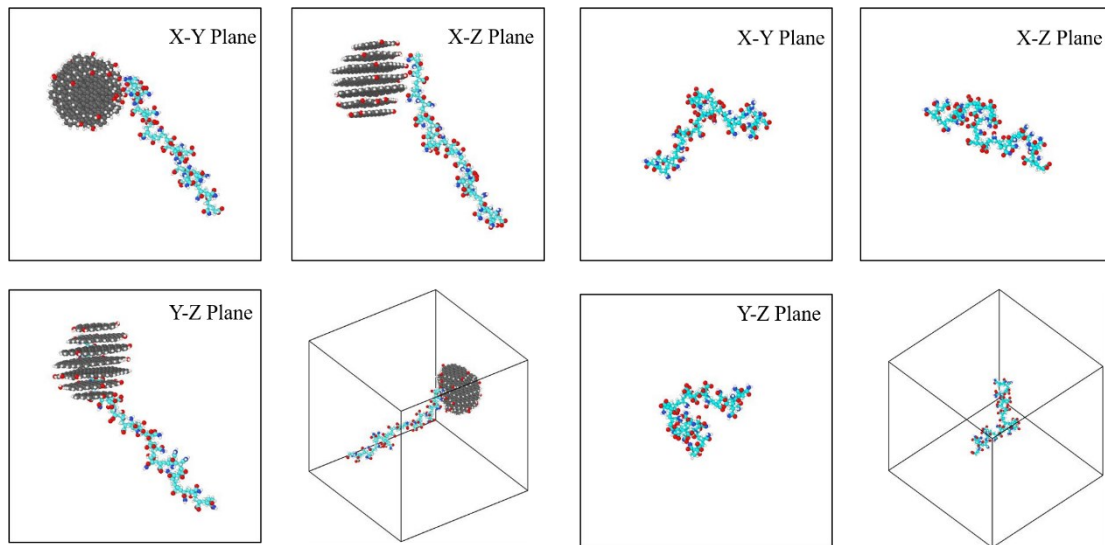

Figure S3 the three-views snapshots of HPAM40\_dot and HPAM40\_solo around  $t = 120$  ns

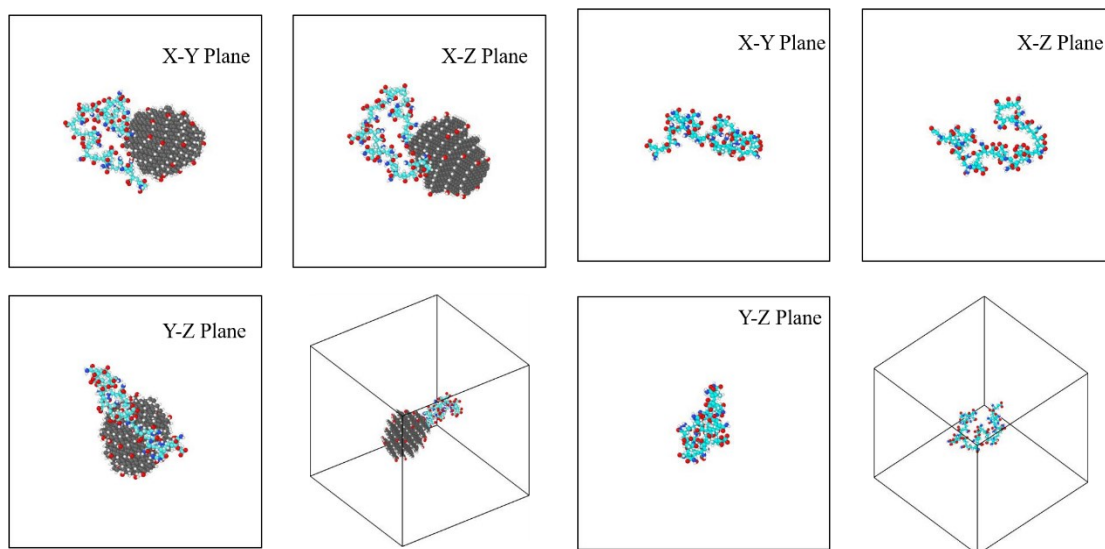

Figure S4 the three-views snapshots of HPAM40\_dot and HPAM40\_solo around  $t = 160$  ns

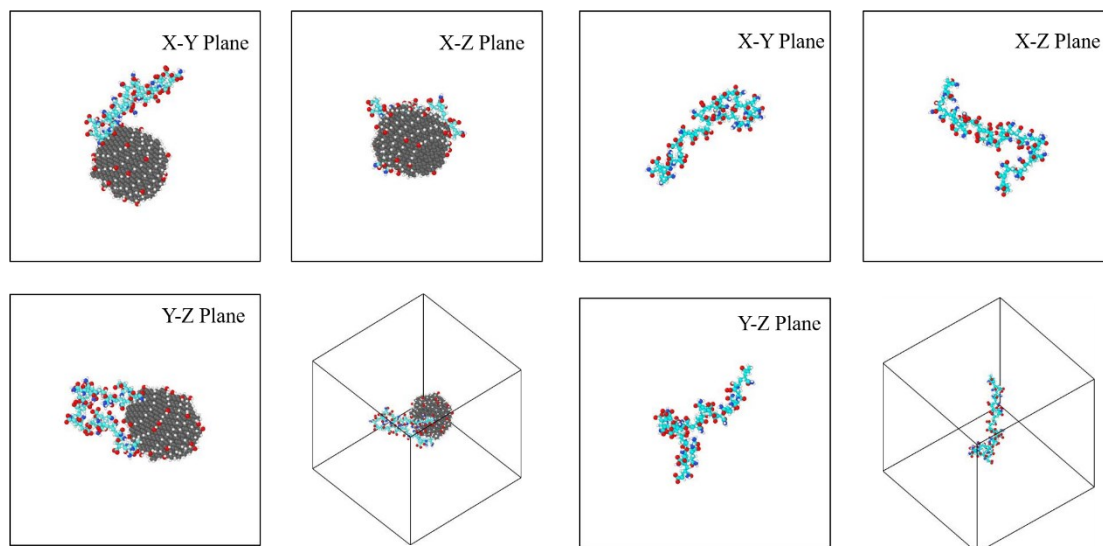

Figure S5 the three-views snapshots of HPAM40\_dot and HPAM40\_solo around  $t = 200$  ns
